# Supplementary material for: Identification of a Novel Geminivirus in Fraxinus rhynchophylla in Korea
Source: MDPI journal article supplement (doi:10.3390/v13122385), 2021-11-28
Supplement: s1 [file s1]

# **Supplementary Data**

Supplementary Figure S1

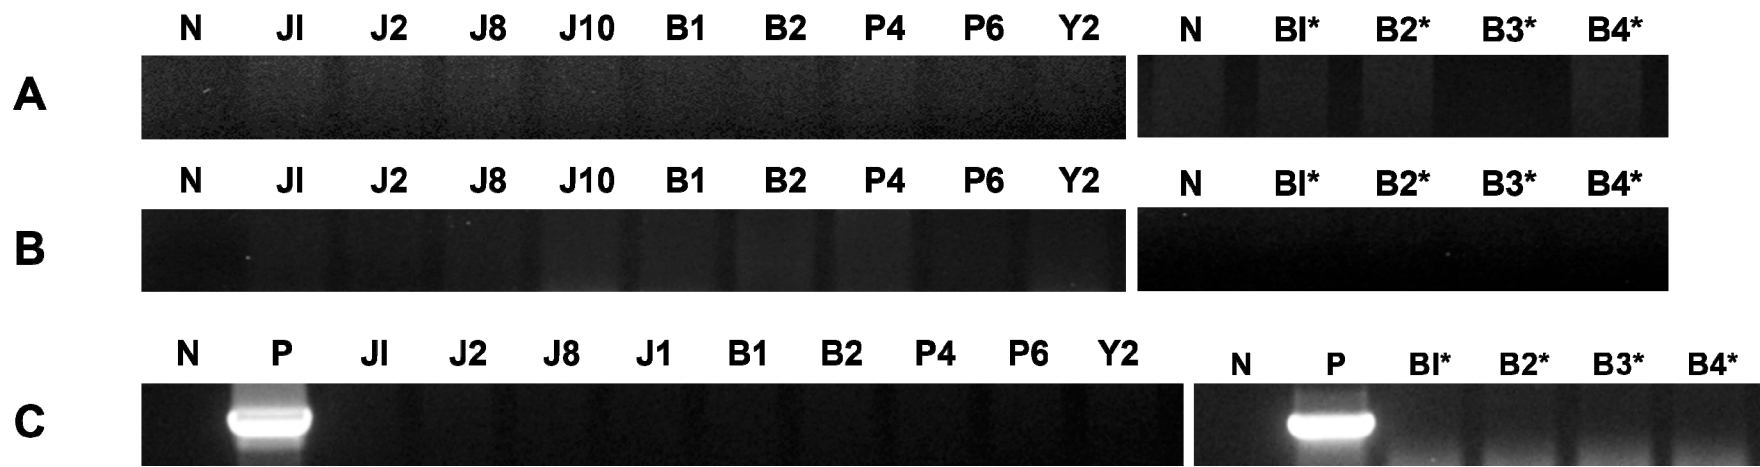

Supplementary Figure S2

Coat Protein

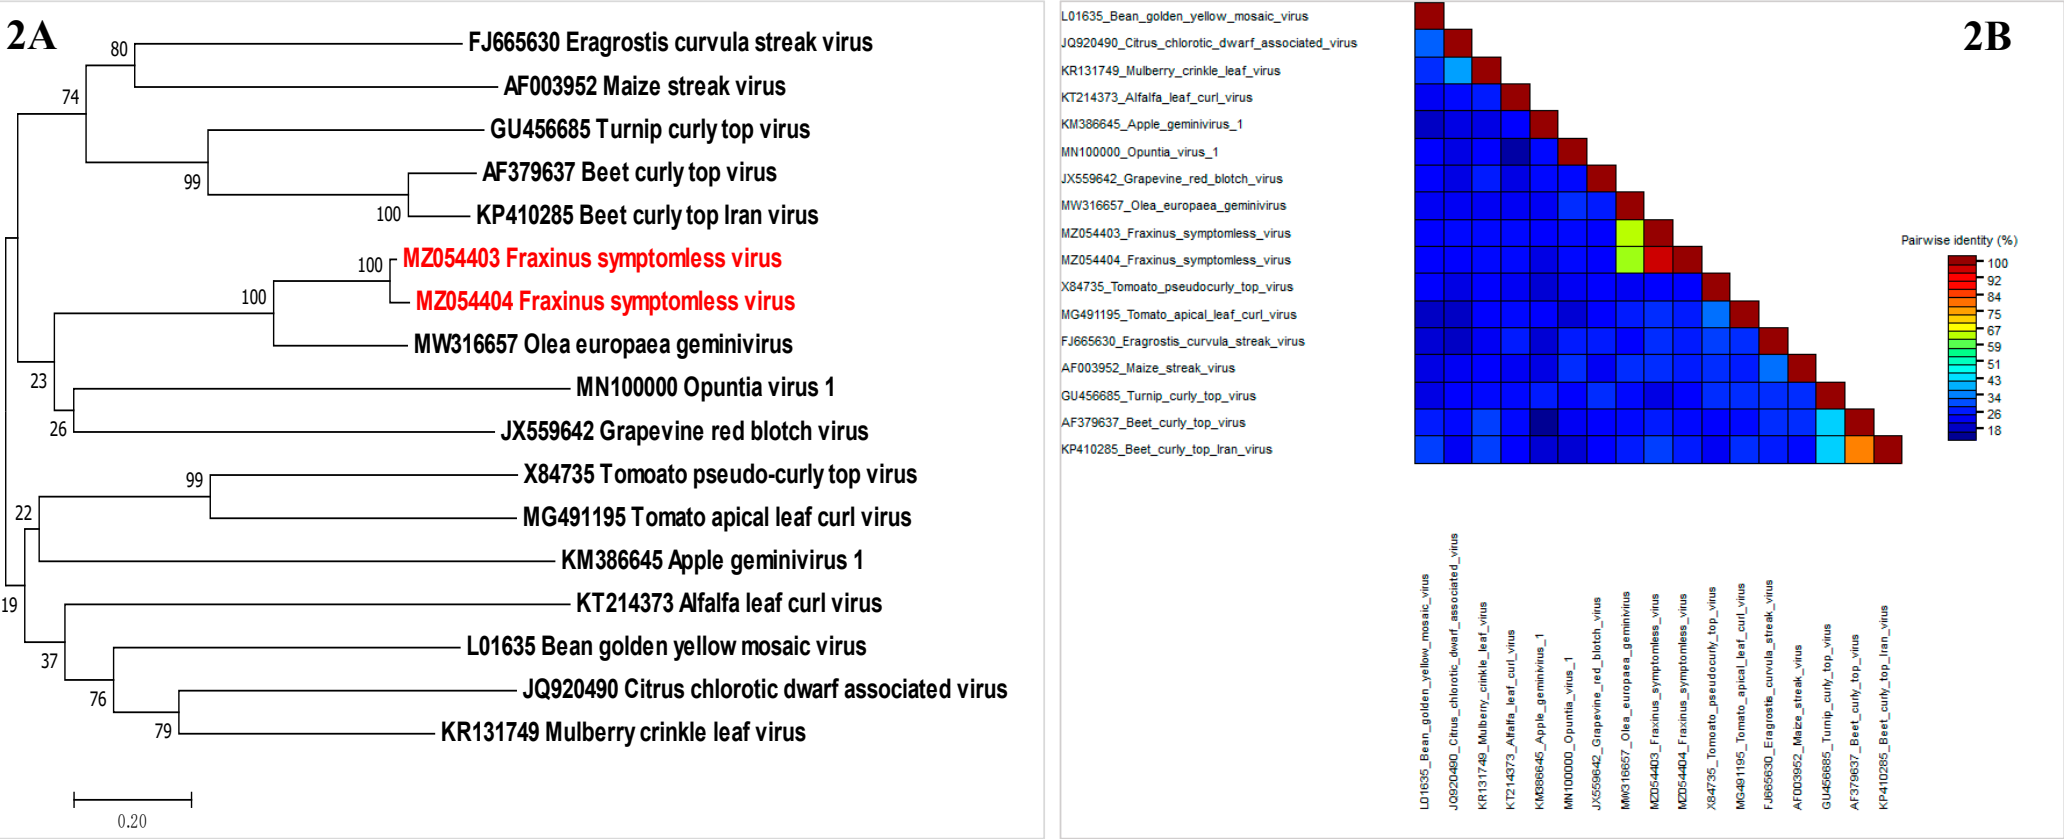

## 2C

### CP\_Identity scores

|                                                   |                                                                                                                         |
|---------------------------------------------------|-------------------------------------------------------------------------------------------------------------------------|
| >L01635_Bean_golden_yellow_mosaic_virus           | 100.001                                                                                                                 |
| >JQ920490_Citrus_chlorotic_dwarf_associated_virus | 31.601,100.001                                                                                                          |
| >KR131749_Mulberry_crinkle_leaf_virus             | 28.001,37.601,100.001                                                                                                   |
| >KT214373_Alfalfa_leaf_curl_virus                 | 21.801,24.801,26.001,100.001                                                                                            |
| >KM386645_Apple_geminivirus_1                     | 18.001,20.801,20.801,23.301,100.001                                                                                     |
| >MN100000_Opuntia_virus_1                         | 22.901,21.201,23.301,14.601,24.901,100.001                                                                              |
| >JX559642_Grapevine_red_blotch_virus              | 22.901,20.601,26.101,21.101,24.501,25.001,100.001                                                                       |
| >MW316657_Olea_europaea_geminivirus               | 21.801,22.501,22.101,22.301,21.801,27.801,25.601,100.001                                                                |
| >MZ054403_Fraxinus_symptomless_virus              | 23.001,24.301,24.401,25.001,23.701,25.101,23.501,63.601,100.001                                                         |
| >MZ054404_Fraxinus_symptomless_virus              | 23.601,23.901,24.901,25.001,21.201,24.701,23.501,62.401,95.601,100.001                                                  |
| >X84735_Tomato_pseudocurly_top_virus              | 24.001,21.301,22.801,22.501,19.301,21.601,23.301,22.401,23.201,23.301,100.001                                           |
| >MG491195_Tomato_apical_leaf_curl_virus           | 18.301,18.601,23.501,24.701,22.801,19.801,23.201,26.301,27.201,25.901,32.801,100.001                                    |
| >FJ665630_Eragrostis_curvula_streak_virus         | 19.701,17.401,21.401,25.701,19.301,25.801,25.901,23.901,26.901,26.101,28.401,27.601,100.001                             |
| >AF003952_Maize_streak_virus                      | 20.201,21.601,22.901,21.801,20.501,27.001,22.101,27.601,27.001,26.601,27.001,26.501,33.601,100.001                      |
| >GU456685_Turnip_curly_top_virus                  | 20.301,23.801,24.201,24.701,25.501,24.101,27.001,24.401,20.901,23.001,28.101,28.201,26.901,27.501,100.001               |
| >AF379637_Beet_curly_top_virus                    | 26.701,24.301,29.601,24.901,13.901,22.301,23.301,25.301,26.301,25.301,23.001,25.101,27.301,28.201,41.401,100.001        |
| >KP410285_Beet_curly_top_Iran_virus               | 28.601,22.301,28.701,23.601,18.801,19.301,23.701,26.301,28.301,25.501,22.601,27.401,25.801,25.301,41.101,78.501,100.001 |

Rep Protein

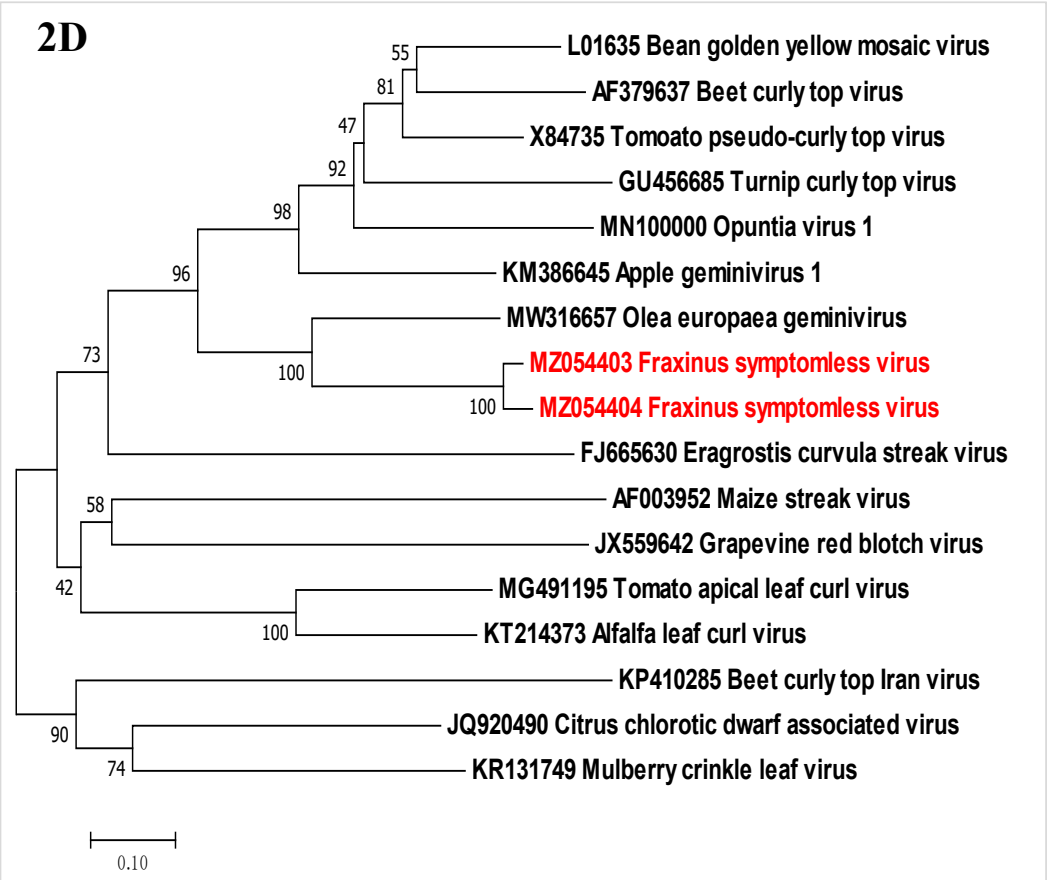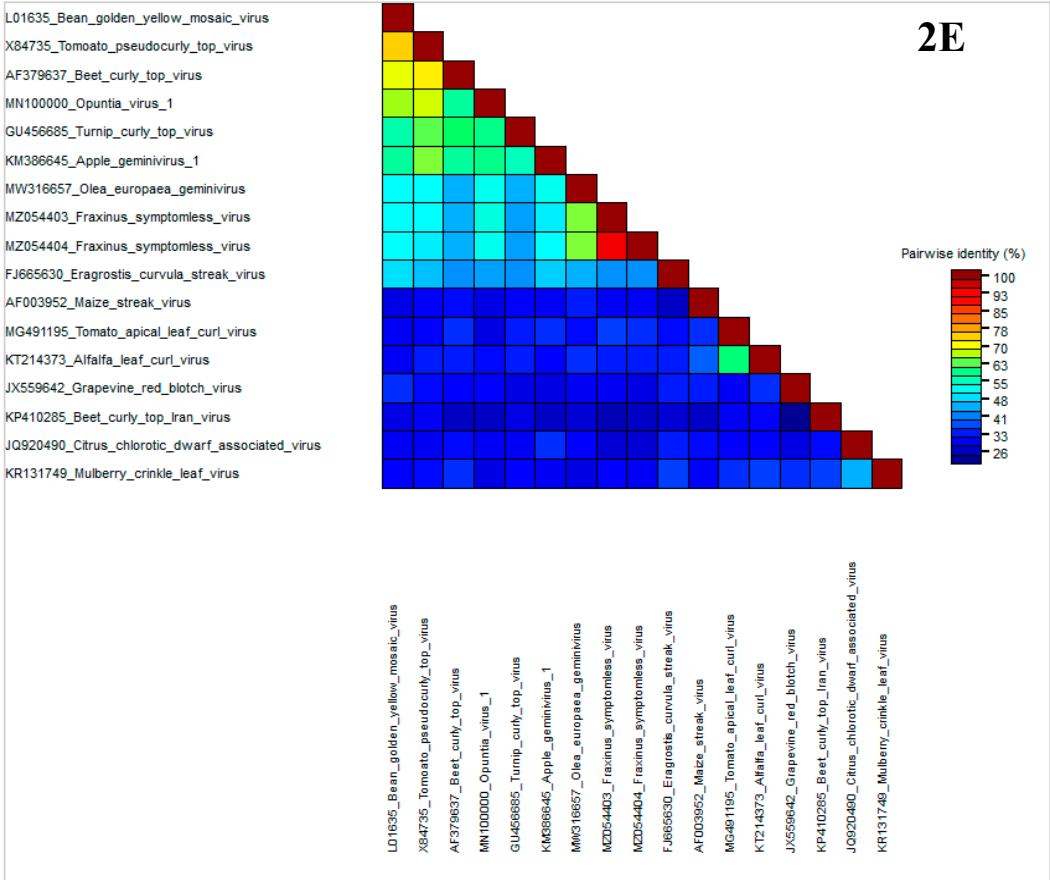

## 2F

|                                                   | Rep_Identity scores                                                                                                     |
|---------------------------------------------------|-------------------------------------------------------------------------------------------------------------------------|
| >L01635_Bean_golden_yellow_mosaic_virus           | 100.001                                                                                                                 |
| >X84735_Tomoato_pseudocurly_top_virus_Rep         | 73.601,100.001                                                                                                          |
| >AF379637_Beet_curly_top_virus                    | 68.801,71.001,100.001                                                                                                   |
| >MN100000_Opuntia_virus_1                         | 65.601,67.401,58.201,100.001                                                                                            |
| >GU456685_Turnip_curly_top_virus                  | 56.801,62.401,61.901,59.301,100.001                                                                                     |
| >KM386645_Apple_geminivirus_1                     | 58.201,63.401,57.301,58.601,54.701,100.001                                                                              |
| >MW316657_Olea_europaea_geminivirus               | 50.101,49.901,44.401,51.901,44.101,51.101,100.001                                                                       |
| >MZ054403_Fraxinus_symptomless_virus              | 50.601,50.601,44.201,52.401,42.901,49.401,63.901,100.001                                                                |
| >MZ054404_Fraxinus_symptomless_virus              | 50.601,49.401,43.901,52.101,43.101,50.001,64.401,94.201,100.001                                                         |
| >FJ665630_Eragrostis_curvula_streak_virus         | 47.301,45.201,41.901,42.401,42.101,46.001,43.901,42.101,41.501,100.001                                                  |
| >AF003952_Maize_streak_virus                      | 28.201,30.701,31.501,28.301,30.401,29.801,33.201,29.001,29.001,25.501,100.001                                           |
| >MG491195_Tomato_apical_leaf_curl_virus           | 29.701,30.301,33.601,27.601,33.101,34.001,31.601,36.001,34.801,31.301,33.901,100.001                                    |
| >KT214373_Alfalfa_leaf_curl_virus                 | 28.801,32.601,32.801,31.701,33.301,31.001,34.201,32.601,32.901,32.701,37.801,59.801,100.001                             |
| >JX559642_Grapevine_red_blotch_virus              | 34.501,31.701,30.801,30.501,27.401,27.901,29.301,29.201,28.501,33.201,33.501,29.801,34.001,100.001                      |
| >KP410285_Beet_curly_top_Iran_virus               | 27.501,29.201,25.001,26.101,28.101,25.401,26.301,24.601,26.001,26.301,26.101,28.901,30.601,21.801,100.001               |
| >JQ920490_Citrus_chlorotic_dwarf_associated_virus | 29.901,29.401,31.501,29.501,28.801,33.801,30.301,26.901,26.901,32.401,31.601,30.601,31.101,28.401,31.301,100.001        |
| >KR131749_Mulberry_crinkle_leaf_virus             | 30.901,31.701,33.801,28.001,30.501,29.601,27.401,30.501,28.901,35.101,31.001,33.901,35.301,33.701,36.001,44.701,100.001 |

### Supplementary Figure S3

|           |                                                                                                                                                 |
|-----------|-------------------------------------------------------------------------------------------------------------------------------------------------|
| 1         | 130                                                                                                                                             |
| MZ054403  | CCACGTGTCA TCATCTTAGG CGTCCACGGA GTGACGCAA TAGTAGTCGA TTTTCGATCGA CGATCCGGTG TGAAGGACTT TACGTCCTTT AAATACATCT ATTTTCGTTGT TCATTTCAAA TGGACTCTTC |
| N1        | CCACGTGTCA TCATCTTAGG CGTCCACGGA GTGACGCAA TAGTAGTCGA TTTTCGATCGA CGATCCGGTG TGAAGGACTT TACGTCCTTT AAATACATCT ATTTTCGTTGT TCATTTCAAA TGGACTCTTC |
| N3        | CCACGTGTCA TCATCTTAGG CGTCCACGGA GTGACGCAA TAGTAGTCGA TTTTCGATCGA CGATCCGGTG TGAAGGACTT TACGTCCTTT AAATACATCT ATTTTCGTTGT TCATTTCAAA TGGACTCTTC |
| N2        | CCACGTGTCA TCATCTTAGG CGTCCACGGA GTGACGCAA TAGTAGTCGA TTTTCGATCGA CGATCCGGTG TGAAGGACTT TACGTCCTTT AAATACATCT ATTTTCGTTGT TCATTTCAAA TGGACTCTTC |
| Consensus | CCACGTGTCA TCATCTTAGG CGTCCACGGA GTGACGCAA TAGTAGTCGA TTTTCGATCGA CGATCCGGTG TGAAGGACTT TACGTCCTTT AAATACATCT ATTTTCGTTGT TCATTTCAAA TGGACTCTTC |
|           |                                                                                                                                                 |
| 131       | 260                                                                                                                                             |
| MZ054403  | TAGGAAGAGG AAGTGGTTCG GCGGTCCGGC TAGGACCGCC GGTCGGAAGA CTCGAAGAGT GTTGCGAGTTT AACAGCACCC AGAGGAATCA GTTGCCAGCT CAATGGCAAC GCGTTCCTCG ATATAATCGA |
| N1        | TAGGAAGAGG AAGTGGTTCG GCGGTCCGGC TAGGACCGCC GGTCGGAAGA CTCGAAGAGT GTTGCGAGTTT AACAGCACCC AGAGGAATCA GTTGCCAGCT CAATGGCAAC GCGTTCCTCG ATATAATCGA |
| N3        | TAGGAAGAGG AAGTGGTTCG GCGGTCCGGC TAGGACCGCC GGTCGGAAGA CTCGAAGAGT GTTGCGAGTTT AACAGCACCC AGAGGAATCA GTTGCCAGCT CAATGGCAAC GCGTTCCTCG ATATAATCGA |
| N2        | TAGGAAGAGG AAGTGGTTCG GCGGTCCGGC TAGGACCGCC GGTCGGAAGA CTCGAAGAGT GTTGCGAGTTT AACAGCACCC AGAGGAATCA GTTGCCAGCT CAATGGCAAC GCGTTCCTCG ATATAATCGA |
| Consensus | TAGGAAGAGG AAGTGGTTCG GCGGTCCGGC TAGGACCGCC GGTCGGAAGA CTCGAAGAGT GTTGCGAGTTT AACAGCACCC AGAGGAATCA GTTGCCAGCT CAATGGCAAC GCGTTCCTCG ATATAATCGA |
|           |                                                                                                                                                 |
| 261       | 390                                                                                                                                             |
| MZ054403  | AGATCCGGCG GATACACGCC GCCGATGCAG CACATGTCCG ATGTGCACGC TATCGAAGAC ATTGGAGATG GAGGTGTTGT TGTCTGCATC AACAACTGTC CCGCCGGCAA CAGCGTCGGA ACGCGGCATA  |
| N1        | AGATCCGGCG GATACACGCC GCCGATGCAG CACATGTCCG ATGTGCACGC TATCGAAGAC ATTGGAGATG GAGGTGTTGT TGTCTGCATC AACAACTGTC CCGCCGGCAA CAGCGTCGGA ACGCGGCATA  |
| N3        | AGATCCGGCG GATACACGCC GCCGATGCAG CACATGTCCG ATGTGCACGC TATCGAAGAC ATTGGAGATG GAGGTGTTGT TGTCTGCATC AACAACTGTC CCGCCGGCAA CAGCGTCGGA ACGCGGCATA  |
| N2        | AGATCCGGCG GATACACGCC GCCGATGCAG CACATGTCCG ATGTGCACGC TATCGAAGAC ATTGGAGATG GAGGTGTTGT TGTCTGCATC AACAACTGTC CCGCCGGCAA CAGCGTCGGA ACGCGGCATA  |
| Consensus | AGATCCGGCG GATACACGCC GCCGATGCAG CACATGTCCG ATGTGCACGC TATCGAAGAC ATTGGAGATG GAGGTGTTGT TGTCTGCATC AACAACTGTC CCGCCGGCAA CAGCGTCGGA ACGCGGCATA  |
|           |                                                                                                                                                 |
| 391       | 520                                                                                                                                             |
| MZ054403  | CACAGAAAGT TCGATGGAGC CGTTTGTTGC TGAAAGGCAA CGTCACCCTT GGTTCGGAAG GAAATGCCCA TAACATATAT CAGTGGATAT ATATGTGGTT GGTCTACGAC AGACGTCCC G GTAACGTCAA |
| N1        | CACAGAAAGT TCGATGGAGC CGTTTGTTGC TGAAAGGCAA CGTCACCCTT GGTTCGGAAG GAAATGCCCA TAACATATAT CAGTGGATAT ATATGTGGTT GGTCTACGAC AGACGTCCC G GTAACGTCAA |
| N3        | CACAGAAAGT TCGATGGAGC CGTTTGTTGC TGAAAGGCAA CGTCACCCTT GGTTCGGAAG GAAATGCCCA TAACATATAT CAGTGGATAT ATATGTGGTT GGTCTACGAC AGACGTCCC G GTAACGTCAA |
| N2        | CACAGAAAGT TCGATGGAGC CGTTTGTTGC TGAAAGGCAA CGTCACCCTT GGTTCGGAAG GAAATGCCCA TAACATATAT CAGTGGATAT ATATGTGGTT GGTCTACGAC AGACGTCCC G GTAACGTCAA |
| Consensus | CACAGAAAGT TCGATGGAGC CGTTTGTTGC TGAAAGGCAA CGTCACCCTT GGTTCGGAAG GAAATGCCCA TAACATATAT CAGTGGATAT ATATGTGGTT GGTCTACGAC AGACGTCCC G GTAACGTCAA |
|           |                                                                                                                                                 |
| 521       | 650                                                                                                                                             |
| MZ054403  | TCCCAGGATT GTGGACATAT TTTCTGGGCA ACAGAATAAC CCCGAAACTT GGATGAAGAA TCAGGATAAT GCAGACCGAT TTGTGGTCTG CATGGAGAAA CGGTGTAGTT TGATTGGGCA CGGATATAGC  |
| N1        | TCCCAGGATT GTGGACATAT TTTCTGGGCA ACAGAATAAC CCCGAAACTT GGATGAAGAA TCAGGATAAT GCAGACCGAT TTGTGGTCTG CATGGAGAAA CGGTGTAGTT TGATTGGGCA CGGATATAGC  |
| N3        | TCCCAGGATT GTGGACATAT TTTCTGGGCA ACAGAATAAC CCCGAAACTT GGATGAAGAA TCAGGATAAT GCAGACCGAT TTGTGGTCTG CATGGAGAAA CGGTGTAGTT TGATTGGGCA CGGATATAGC  |
| N2        | TCCCAGGATT GTGGACATAT TTTCTGGGCA ACAGAATAAC CCCGAAACTT GGATGAAGAA TCAGGATAAT GCAGACCGAT TTGTGGTCTG CATGGAGAAA CGGTGTAGTT TGATTGGGCA CGGATATAGC  |
| Consensus | TCCCAGGATT GTGGACATAT TTTCTGGGCA ACAGAATAAC CCCGAAACTT GGATGAAGAA TCAGGATAAT GCAGACCGAT TTGTGGTCTG CATGGAGAAA CGGTGTAGTT TGATTGGGCA CGGATATAGC  |
|           |                                                                                                                                                 |
| 651       | 738                                                                                                                                             |
| MZ054403  | GATACGGCTA TGGTGACCGA TAGATCTCCC AATTTTGCGT ACATGCGATC GCGTCCGATA TCGGTGAACA AGAAATTGAC CGGGACTA                                                |
| N1        | GATACGGCTA TGGTGACCGA TAGATCTCCC AATTTTGCGT ACATGCGATC GCGTCCGATA TCGGTGAACA AGAAATTGAC CGGGACTA                                                |
| N3        | GATACGGCTA TGGTGACCGA TAGATCTCCC AATTTTGCGT ACATGCGATC GCGTCCGATA TCGGTGAACA AGAAATTGAC CGGGACTA                                                |
| N2        | GATACGGCTA TGGTGACCGA TAGATCTCCC AATTTTGCGT -CATGCGATC GCGTCCGATA TCGGTGAACA AGAAATTGAC CGGGACTA                                                |
| Consensus | GATACGGCTA TGGTGACCGA TAGATCTCCC AATTTTGCGT aCATGCGATC GCGTCCGATA TCGGTGAACA AGAAATTGAC CGGGACTA                                                |

**Supplementary Figure S4**

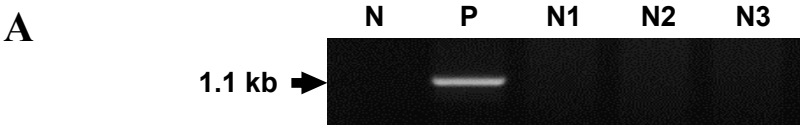

**B**

| Primer | Sequence 5' – 3'     | Product Size |
|--------|----------------------|--------------|
| pCam-F | GCACTGGAACCCCAAGC    | 1.1 kb       |
| pCam-R | TTAGGAACCGGCGGATGCTT |              |

## Supplementary Figure S5

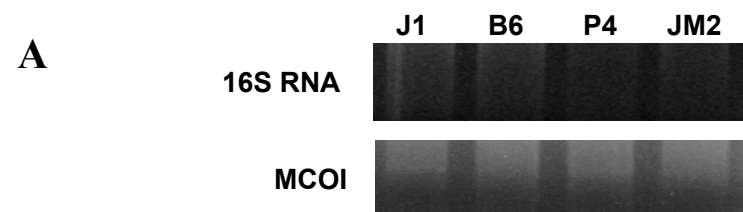

**B**

| Primer   | Sequence 5' – 3'         | Product Size | Reference            |
|----------|--------------------------|--------------|----------------------|
| 16SRNA-F | CCGGTTTGAACCTCAGATCATGT  | 552 bps      | Simon et al. 1994    |
| 16SRNA-R | CGCCTGTTTAACAAAAACAT     |              |                      |
| MCOI-F   | TATATCTTTCCCACGATTAAATAA | 1.2 kb       | Wang, J. et al. 2011 |
| MCOI-R   | GCATATTAATTCTGCCATATTAG  |              |                      |

## Supplementary Figure S6A

>MZ054403 *Fraxinus* symptomless virus

ACTGGCTCGCCCGCGCCGGGACTTCCGTACGCCCACGTGTCATCATCTTAGGCGTCCACGGAGTGACGCAAATAGT  
AGTCGATTTTCGATCGACGATCCGTTGTGAAGGACTTTACGTCCTTTAAATACATCTATTTTCGTTGTTTCATTTCAAAT  
GGACTCTTCTAGGAAGAGGAAGTGGTTCGGCGGTCCGGCTAGGACCGCCGGTCGGAAGACTCGAAGAGTGTTGCAGT  
TTAACAGCACCCAGAGGAATCAGTTGCCAGTCAATGGCAACGCGTTCTTCGATATAATCGAAGATCCGGCGGATAC  
ACGCCGCCGATGCAGCACATGTCCGATGTGCACGCTATCGAAGACATTGGAGATGGAGGTGTTGTTGTCTGCATCAA  
CAACTGTCCCGCCGGCAACAGCGTCGGAACGCGGCATACACAGAAAAGTTCGATGGAGCCGTTTGTGTGCTGAAAGGCA  
ACGTCAACCTTGGTTCCGAAGGAAATGCCATAACATATATCAGTGGATATATATGTGGTTGGTCTACGACAGACGT  
CCCGGTAACGTCAATCCCAGGATTGTGGACATATTTTCTGGGCAACAGAATAACCCCGAACTTGGATGAAGAATCA  
GGATAATGCAGACCGATTTGTGGTCTGCATGGAGAAACGGTGTAGTTTGATTGGGCACGGATATAGCGATACGGCTA  
TGGTGACCGATAGATCTCCCAATTTTGCCTACATGCGATCGCGTCCGATATCGGTGAACAAGAAATTGACCGGGACT  
ACCTTGTTCAAGGATACCACCGACGGAGGAGTCGGTGATATGGATCGCGGAGCTTATTACTTAGTTTTTAGTACGTT  
CCAGTCGTATCATGTAATGTAACGCTGAATAAGCGAATGTGGTTCAAAAGCATTTAATAAAATGAAATGTATTATCAT  
TTTCCACTCTCCAGTCTACAATGAGTTTGTTCATGAACACATTACATCTTGAACACAATACAAGAAGTTGTACAAA  
GAAATAACCCCTAAGTTGTCTAATTTTTTATGGATATAAAAAATAAGACGTTGGGATAAATTCCCAGAAATCATCTT  
CAACAACGTCTCCTCGTTTATCGTCGTCGACGTCCGTCTTAATGTCGTCCAGATGCGGATAGTCCACCACGCTCTCT  
TTATTCCCAATTTCAATCTGAGGTTGTAGTTGAACCTCAGTTCCACGTTGAACATGTGGTGGAACGGTGGATTTCGTC  
GTCTGTCCAGAGTGTTGGACTCGAATCCAGAACGGGTTGTTTCAGTACCCAAGTGATTCTCCTACTTGTTAGTTGCTG  
CCATGTGAGTGGCTCCCTGTGTTGGAATCCATGATTCCGGCACTCTATGGTCTGATGTATTATGCAGCCACACGGC  
AGCTCGAGACGTCTAGGCTTGATTACTAGACGCTTCTTCCGTTTGCATCGGTGATGCTTCGCTCCTATAGAAGGGGG  
TGTCGGCGATGAAGAATTCTGCATTTGCTAGAGTCCAGAGGTTTCAGGCCGTAGTTGCAGTCCAACTGCAGAAAATCT  
CTATAAGAAGATTCTCCTGGATTGCCCAGCACGATACCCGGGATACCACCTTTAATTTGAATTGGTTTGGCGTACTT  
GGCATTGTGATTGCCAATCCCTTTGGGCCCAATGAGCTCCTTCCAATGTTTCTTTTGGAGATAAGACGGAGTCACGT  
CGTCGATGACGTTGTACCAGGCTTTATTGGAGAAAGTTCTAGAATTGAAGTCCATGAAGCCCATTAACATAATTATGT  
GGGCCTAAAGATCTGGCCCATGCAGTCTTCCCAATCCTGGATTTCGCTTCGAGAATCAGGCTCTTGGGCCTGTGAGG  
CCTATCGTTAGTATCTCTGATATTTTCTCTGGCCCAATTTGATAAACTGTTCCGGTACCTGGAACGATTCCGGATTGA  
ATTCCGGTACATACTCTTTAACTGGTACTGCAAATTCCTTCTCCATGTTAGCTATGATATTATGACGTTGCAGAGCG  
TACGTCCTGGGATCGCATCGCTTTATAATTGCGATCGATTCTTCTTTCGTCTCGGATTAAGAGCTCTTGTGTATTC  
CTCGTCGATATCTAGTTTATCGCGACGACGTTTGCACCGTCCGTCTGGAATTTCGCCTTCTTCGACGTAAATTCCTC  
CCTTCGCTATGTAGTCGGCGACGTCTGTCGCCGACCTAGCGCTCTGCACGTTTCGATGGTGTACCTCTCCCGTATTT  
CGGTTCGACGATGTCGAAGAACCTACTGTTCCGACACTTGTAATTCCTGAGAATTGAATTAGACAGTGGAGGTGCTG  
TGCACCGTCGGTGTGCGACTCCTCGCATACCCCTTATGAAAACCCAAATTGATCGGAAAGCCGAGAGATTTTAACTCGA  
TTAAGACGATGTCTTCGATATCGGACATCGGGCATACGTCAAGAAGTAGTTCTTGGCGTTTATCAAGAATCGCGGT  
GAAGATTGGGAAGACATTGGGAATTTGTAAAATTTGGGGATTTTACACAGTGTGATTGCAACAGTAACCAGGTCC  
TCCTAACTTAAGCCATTTGTATTGGTGACTGGGGACAGAATAATATAGGGTCCTTATTCAGTGTCTCCTACCTTAC  
GTCATCATTGACGTATCAAATTCAAATTCAAATTTTGAATTTTCCCTCCCTACAGTACCCGGGGGTACTATATCTA  
TCTTTTCATCAGGCCCCCGCAGGGGCTTTATCTCGGGTCCATACCACGGTAGGCCCAATGGGCGAGCCATATAATAT

## Supplementary Figure S6B

>MZ054404 *Fraxinus* symptomless virus

ACTGGCTCGCCCGACCGGGGACTTCCGTACGCCCACGTGTCATCATCTTATCCGTCCACGAAGTGGACGCGAATAGT  
AGTCGATTTGGATCGACGATCCGTTTGGAGAACTTTACGTTCTTTAAATACACCTATTTTCGTTGTTCAATTCAAAT  
GGACTCTTCTAGGAAGAGGAAGTGGTTCAGCGGTCCGGCTAGGTCCGCCGGTCGGAAGACTCGAAGAGTGTTCAGT  
TTAACAGCACCCAGAGGAATCAGTTGCCAGCTCAATGGCAACGTGTTCTTCGATATAATCGAAGACCCGGCGGATGC  
ACGCCGCCGATTAGCACATGTCCGATGTGCACGCGATCGAAGACATCGGAGATGGCGGTGTTGTTGTCTGCATCAA  
CAACTGTCCCCTGTTAACATCGTCGGAACGCGACATACACAGAAAGTTTCGATGGAGCCGTTTGTGCTGAAAGGCA  
ACGTCACCCTCGGTTCCGAAGGAAATGCCACAATATATATCAGTGGATATATATGTGGTTAGTCTACGATAGACGT  
CCTGGTAACGTCAATCCCAGGATTATTCGATTATTTTCTGGGCAACAGAATAACCCCGAACTTGGATGAAGAATCA  
GGATAATGCAGACCGATTTGTGGTCTGCATGGAGAAACGGTATAGTTTGATTGGGCACGGATATAGCGATACGGCTA  
TGGTGACCGATAGATCTCCCAATTTTGCTTACATGCGATCGCGTCCGATATCGGTGAACAAGAAACTGACTGGGACT  
ACCTTGTTCAAGGATACCACCGACGGAGGAGTCCGTGATATGGATCGCGGAGCTTATTACTTAGTTTTTAGTACGTT  
CCAGTCGTATCATGTAAATGTAACGCTGAATAAGCGAATGTGGTTCAAAAGCGTTTAATAAAATGAAATGTATTCAT  
TTTCCACTCTCCAGTCTACAATGAGTTTGTTCATGAACACATTACATCGTGAACACAATACAAGGAGTTGTACAAA  
GAAATAACCCCTAAGTTGTCTAATTTTTTATGGATATAAAAAATAAAGACGTTGGGATAAAATCCCAGAAATCATCTT  
CAACAACGTCTCCTCGTTTATCGTCATCGACGTCCGTCTTAATGTCTGTCAGATGCGGATAGTCCACCACGCTCTCT  
TTATTTCCCAATTTTCATTCTGAGGTTGTAGTTGAACCTCAGTTCCACGTTGAACATTTGGTGGAACGGTGGATTTCGTC  
GTCTGTCCAGAGTGTGGACTCGAATCCAGAACGGGTTGTTCAATACCCAAGTGTATTCTCCGACTTGTAGTTGCTG  
CCATGTGAGTGGCTCCCCTGTGTTGGAATCCATGATTCGGGCACTCTATTGTCTGATGTATTATGCAGCCACACGGC  
AGTTCGAGACGTCTAGGCTTGATGACTAGACGTTCTTCCGTTTGCATCGGTGATGCTTCGCTCCTATAGAAGGGG  
TGTCGGCGATGAAGAATTCTGCATTTGCTATAGTCCAGAGATTCAAGCCGTAGTTGCAGTCTAACTGCAAAAAATCT  
CTATAAGAAGATTCTCCTGGATTGCACAGCACGATACACGGGATACCACCTTTAATTTGAATTTGGTTTGCCGTACTT  
GGCATTTGATTGCCAATCCCTTTGGGCCCAATGAGCTCCTTCCAATGTTTCTTTGGAGATAAGACGGAGTGACGT  
CGTCGATGACGTTGTACCAGTTTTATTGGAGAACGTTTTACAATTGAAGTCCATGAAGCCATTACATAATTATGT  
GGGCCTAAAGATCTGGCCCAAGCAGTTTTTCCCAAGCCTGGATTTCGCCTTCGAGGATCAGACTTTTGGGCCTGTGAGG  
CCTATCGTTAATATCTCTGATATTTTCTCTGACCCATATTGATAACTGTTTCGGGTACCTGGAATGACTCCGGATTGA  
ACTCCGGTGCATATTCTTGAACAGGTGGTGCAAATTCCTTCTCCATATTAGCAATGATATTGTGACGTTGCAGAGCG  
TACGTCCTGGGATCGCATCGCTTTATAATTGCGATCGATTCTTCTTTCGTTCTGGCATTAGAGCTCTTGTGTATTC  
CTCGTCGAGATCTGTTTTATCGCGACGACGTTTGCAGCCGTCCGCCGAAACTCGCCTTCTTCGACGTAAATTCCTC  
CCTTCGTATGTAGTCGGCGACGTCGTCCGCCGACCCCGCGCTCTGCACGTTTCGGATGGTACACCTCTCCTGTATTT  
CGGTCGACTATGTGAAGAACCCTACTGTTCCGACACTTGTACTTCCCTGAGAATTGAATTAGACAGTGGAGGTGCTG  
TGCACCGTTCGGTGTGCGACTCCTCGCATACCCTTATGAAAACCAATTGATCGGAAAGCCGAGCGATTTAACTCGA  
TTAAGACGATGTCTTCGATATGGGACATCGGGCATAACGTCGAAGAAGTAGTTCTTGGCGTTAATTAAGAAACGCGGT  
GACGATTGGGAAGACATTGGGGATTGTAAAAATTTGGGGATTTTACACAGTGCCAATTGAAAAAGTAACAGGGGCC  
TTCAATATAACCTATTTGTATTGGTGACTGGGGACAGTGTTATATAGGGTCCTTATTCAGTGTCTCTTACCTTACG  
TCATCATTTGACGTCATCACATTCAAATTTGAATTTTCCCTCCCTACAGTACCGGGGGTACTATATCTATCATTTTAC  
CAGGCCCGCAGGGGCTTTATCTCGGGTCCATACCACGGTAGACCCAATAGGCGAGCCATATAATATT

**Supplementary TableS1.** Primers used to detect FSMV DNA-A. DNA-B and to confirm the existence of virion-sense (VS) and complementary-sense (CS) DNA molecules in strand-specific amplification PCR procedure.

| Primer        | Sequence (5'-3')               | Loci      | Size    | Primer  | Sequences 5'-3'                               |
|---------------|--------------------------------|-----------|---------|---------|-----------------------------------------------|
| Ash gemini 2F | CCACGTGTCATCATCTTAGG           | 27 - 46   | 737bp   | Taq     | AGTTTAAGAACCCTTCCCGC                          |
| Ash gemini 2R | TAGTCCCGGTCAATTCTTG            | 745 - 764 |         | OVS     | GGAGGTGTTGTTGTCTGCATC                         |
| Primer        | Sequences 5'-3'                |           | Product | OCS     | GTCTGTCGTAGACCAACCACA                         |
| Tree-F2       | AGT GTT GGA CTC GAA TCC AGA A  |           | 2.7 kb  | Taq-OVS | AGTTTAAGAACCCTTCCCGCG<br>GAGGTGTTGTTGTCTGCATC |
| Tree-R2       | CTG GAC AGA CGA CGA ATC CA     |           |         | Taq-OCS | AGTTTAAGAACCCTTCCCGCGT<br>CTGTCGTAGACCAACCACA |
| Primer        | Sequences 5'-3'                |           | Product |         |                                               |
| PBL1v20140    | GCCTCTGCAGCARTGRTCKATCTTCATACA |           | 600 bps |         |                                               |
| PCRc1         | CTAGCTGCAGCATATTTACRWATGCCA    |           |         |         |                                               |
